# Supplementary material for: A statistical normalization method and differential expression analysis for RNA-seq data between different species
Source: PubMed Central journal article supplement (PMC6441199; doi:10.1186/s12859-019-2745-1), 2019-03-29

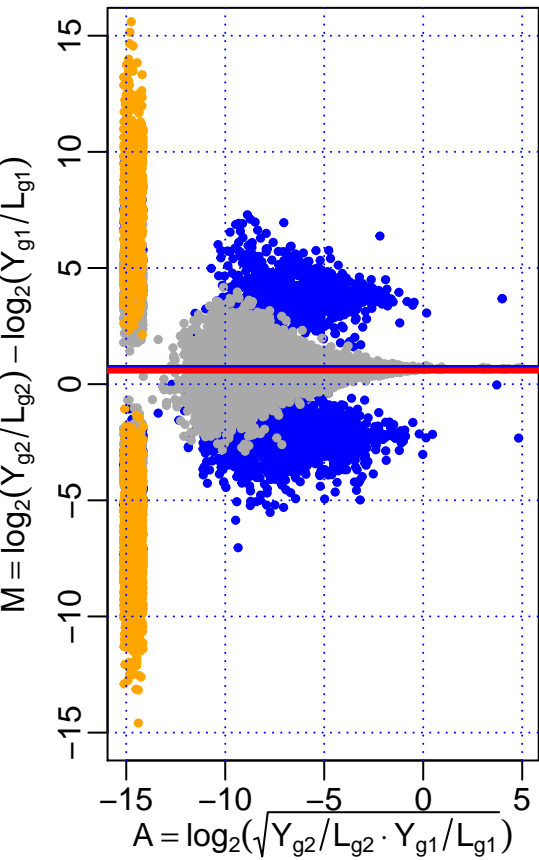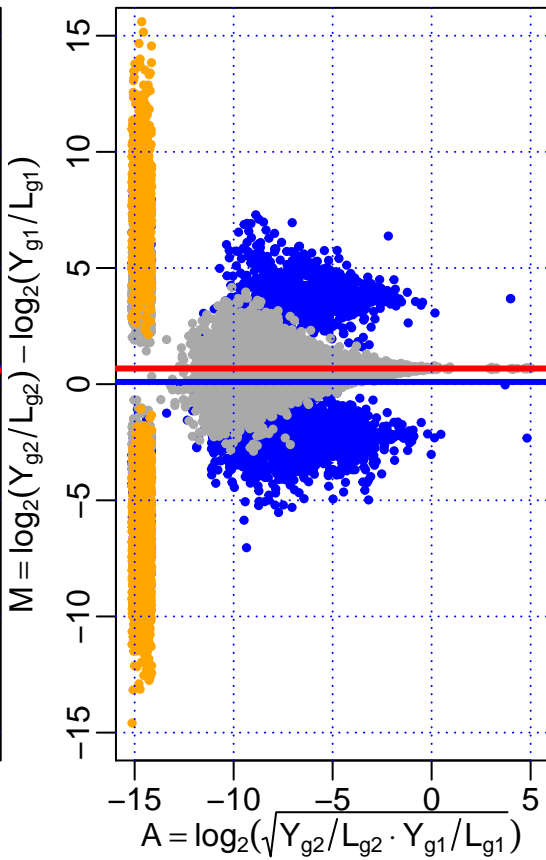

Supplement: 12859_2019_2745_MOESM2_ESM.pdf [file 12859_2019_2745_MOESM2_ESM.pdf]
